# Supplementary material for: Utility of Three-Protein Panels in the Separation of Aggressive Prostate Cancer from Non-Aggressive Tumors
Source: Research Square preprint supplement (doi:10.21203/rs.3.rs-1047551/v1), 2021-11-15
Supplement: Supplementary file 1 [file 7a9aa3095e5f7f5e42151df1.xlsx]

## Sheet: TMA976
CASE #	AGE	SEX	LOCATION	DIAGNOSIS	GLEASON SCORE	GLEASON GRADE MULTIFOCAL/ TERTIARY	pT	N	M	Block No. for Tumor	Block No. for Normal
1	61	M	PROSTATE	ADC	5+4	3	3B	1		4LGA	4LB
2	68	M	PROSTATE	ADC	4+5	3,3+3	3B	1		3REA,3REP	3LEP
3	49	M	PROSTATE	ADC	5+5		4	0		5RIA	5RBA
4	63	M	PROSTATE	ADC	4+3		3A	0	X	3RBA	3RCP
5	56	M	PROSTATE AND SEMINAL VESICLES	ADC	4+3	4+3	3A	0	X	3RDUMA	3LAA
6	56	M	PROSTATE AND SEMINAL VESICLES	ADC	4+3	3+4	2X	0	X	3RDUMB	3LDP
7	64	M	PROSTATE AND SEMINAL VESICLES	ADC	4+3		3A	0	X	3LBP	3RBP
8	62	M	PROSTATE AND SEMINAL VESICLES	ADC	4+5		2	0	X	3RDA,3RAA	3RBP
9	56	M	PROSTATE AND SEMINAL VESICLES,VASA DEFERENTIA AND PELVIC LN	ADC	4+5	3+4	3B	0	X	3LCP	3REA
10	62	M	PROSTATE AND SEMINAL VESICLES,VASA DEFERENTIA AND PELVIC LN	ADC	4+5	3+4	3B	0	X	3RBA	3LEP
11	59	M	PROSTATE AND SEMINAL VESICLES	ADC	4+3	3+4	2	0	X	3RCA	3LAP
12	62	M	PROSTATE AND SEMINAL VESICLES	ADC	4+5	3,4+3	2	0	X	3RDA	3LCA
13	65	M	PROSTATE AND SEMINAL VESICLES,VASA DEFERENTIA AND PELVIC LN	ADC	4+3		2	0	X	1RDA	1RDP
14	64	M	PROSTATE AND SEMINAL VESICLES,VASA DEFERENTIA AND PELVIC LN	ADC	4+3		2	0	X	3RBP	3RFP
15	73	M	PROSTATE	ADC	4+3	5	2	0	X	3RDUMB	3LCA
16	57	M	PROSTATE (Transuretheral res)	ADC	5+4		4	1	NA	1D,1E	1C
17	64	M	PROSTATE AND SEMINAL VESICLES	ADC	4+3	3+4	3A	0	X	3LEP	3REP
18	59	M	PROSTATE AND SEMINAL VESICLES,VASA DEFERENTIA AND PELVIC LN	ADC	5+4		3B	0	X	3LDP,3LIP	3RIA
19	57	M	PROSTATE	ADC	4+3	5, 4+3	3A	0	X	3RA	3LCP
20	54	M	PROSTATE AND SEMINAL VESICLES,VASA DEFERENTIA AND PELVIC LN	ADC	4+5	3, 4+3,5	3B	0	X	3RDP,3LCP	3LBA
21	43	M	PROSTATE	ADC	4+3		3A	0	X	3RDP	3RGP
22	60	M	PROSTATE AND SEMINAL VESICLES,VASA DEFERENTIA AND PELVIC LN	ADC	4+3		2	0	X	3RA,3RDUMB	3LEP
23	59	M	PROSTATE AND SEMINAL VESICLES,VASA DEFERENTIA AND PELVIC LN	ADC	5+4		3B	1	X	3LA	3RFA
24	40	M	PROSTATE AND SEMINAL VESICLES,VASA DEFERENTIA AND PELVIC LN	ADC	4+3	5	3B	1	X	3LB	3RAP
25	45	M	PROSTATE AND SEMINAL VESICLES	ADC	4+4	3, 3+3	3A	0	X	3REA,3RFA	3LCP
26	63	M	PROSTATE AND SEMINAL VESICLES	ADC	4+4	3,3+3	3A	0	X	3LEP	3RBP
27	69	M	PROSTATE AND SEMINAL VESICLES,VASA DEFERENTIA AND PELVIC LN	ADC	4+4	3,3+3	2	0	X	3LCP,3LDA	3LHA
28	67	M	PROSTATE AND SEMINAL VESICLES,VASA DEFERENTIA AND PELVIC LN	ADC	4+3	3+4	2	0	X	3LDUMB,3LB	3RGA
29	65	M	PROSTATE	ADC	4+5		2	0	X	3RCAPAL,3RA	3LGP
30	66	M	PROSTATE AND SEMINAL VESICLES,VASA DEFERENTIA AND PELVIC LN	ADC	4+5		3A	0	X	3RCP	3LDA
31	62	M	PROSTATE AND SEMINAL VESICLES,VASA DEFERENTIA AND PELVIC LN	ADC	4+3	5	3B	0	X	3RVDSV	3REA
32	67	M	PROSTATE AND SEMINAL VESICLES,VASA DEFERENTIA AND PELVIC LN	ADC	4+3	5,3+4	3A	0	X	3RA,3RBP	3LCA
33	68	M	PROSTATE AND SEMINAL VESICLES,VASA DEFERENTIA AND PELVIC LN	ADC	4+3		2	0	X	3LA,3LB	3RDP
34	55	M	PROSTATE AND SEMINAL VESICLES,VASA DEFERENTIA AND PELVIC LN	ADC	4+5	4+5	3B	0	X	3LDUMA	3RGA
35	65	M	PROSTATE AND SEMINAL VESICLES,VASA DEFERENTIA AND PELVIC LN	ADC	4+4	4+3	2	0	X	3LDP	3LGP
36	69	M	PROSTATE AND SEMINAL VESICLES,VASA DEFERENTIA AND PELVIC LN	ADC	4+3	5,4+3	2	0	X	3RAP	3LDA
37	65	M	PROSTATE AND SEMINAL VESICLES	ADC	4+4	5	3B	0	X	3RBA	3LCA
38	50	M	PROSTATE AND SEMINAL VESICLES,VASA DEFERENTIA AND PELVIC LN	ADC	3+3	3+3	3A	0	X	2REA	2LF
39	70	M	PROSTATE AND SEMINAL VESICLES	ADC	3+3		3A	0	X	3LDUMA	3RCA
40	63	M	PROSTATE AND SEMINAL VESICLES	ADC	3+3	3+3	2	0	X	3RAP	3LCP
41	62	M	PROSTATE AND SEMINAL VESICLES	ADC	3+3	3+3	2	0	X	3LEP	3RDP
42	63	M	PROSTATE AND SEMINAL VESICLES	ADC	3+3		2	0	X	3LB,3LA	3LFP
43	66	M	PROSTATE AND SEMINAL VESICLES,VASA DEFERENTIA AND PELVIC LN	ADC	3+3		2	0	X	3REA	3LFA
44	46	M	PROSTATE AND SEMINAL VESICLES,VASA DEFERENTIA AND PELVIC LN	ADC	3+3	3+3	2	0	X	3LCA	3LGA
45	48	M	PROSTATE AND SEMINAL VESICLES,VASA DEFERENTIA AND PELVIC LN	ADC	3+3		2	0	X	3RCP	3RFP
46	56	M	PROSTATE AND SEMINAL VESICLES,VASA DEFERENTIA AND PELVIC LN	ADC	3+3	3+3	2	0	X	3REP	3REA
47	55	M	PROSTATE	ADC	3+3	3+3	2	0	X	3RDUMB	3RFA
48	56	M	PROSTATE AND SEMINAL VESICLES,VASA DEFERENTIA AND PELVIC LN	ADC	3+3		2	0	X	3RBP	3LHP
49	51	M	PROSTATE AND SEMINAL VESICLES	ADC	3+3		2	0	X	3LFP	3RCA
50	52	M	PROSTATE AND SEMINAL VESICLES,VASA DEFERENTIA AND PELVIC LN	ADC	3+3		2	0	X	3RA	3RFP
51	52	M	PROSTATE	ADC	3+3		2	0	X	3RB	3LGA
52	66	M	PROSTATE AND SEMINAL VESICLES,VASA DEFERENTIA AND PELVIC LN	ADC	3+3	3+3	2	0	X	3RBP	3LA
53	53	M	PROSTATE	ADC	3+3		2	0	X	3LCA	3RHP
54	54	M	PROSTATE AND SEMINAL VESICLES,VASA DEFERENTIA AND PELVIC LN	ADC	3+3		2	0	X	3LFA	3LHP
55	61	M	PROSTATE AND SEMINAL VESICLES,VASA DEFERENTIA AND PELVIC LN	ADC	3+3		3A	0	X	1RFA	1REP
56	61	M	PROSTATE AND SEMINAL VESICLES	ADC	3+3	3+3	2	0	X	3RCA	3LFP
57	60	M	PROSTATE AND SEMINAL VESICLES	ADC	3+3	3+3	2	0	X	3RCA,3RDUMA	3RGA
